# Supplementary material for: Mass partitioning effects in diffusion transport
Source: Royal Society of Chemistry journal article supplement (doi:10.1039/c5cp02720a), 2015-01-01
Supplement: c5cp02720a1.pdf [file c5cp02720a1.pdf]

## SUPPLEMENTARY MATERIAL

### Mass partitioning effects in diffusion transport

Milos Kojic<sup>1,2,3</sup>, Miljan Milosevic<sup>2</sup>, Suhong Wu,<sup>1</sup> Elvin Blanco<sup>1</sup>, Mauro Ferrari<sup>1</sup>, Arturas Ziemys<sup>1,\*</sup>

<sup>1</sup> - Houston Methodist Research Institute, Houston, TX 77030; <sup>2</sup> - Belgrade Metropolitan University - Bioengineering Research and Development Center BioIRC Kragujevac, 34000 Kragujevac, Serbia; <sup>3</sup> – Serbian Academy of Sciences and Arts, 11000 Belgrade, Serbia.

\* The corresponding author: 6670 Bertner Ave., R7-116, Houston, TX 77030. Tel: (713) 441 7320. Email: [aziemys@houstonmethodist.org](mailto:aziemys@houstonmethodist.org)

#### I. Nanoparticle characteristics

Full characterization of the polymer nanoparticles, including average size, size distribution, and zeta potential, can be found in the previously published work [1]. Briefly, resulting nanoparticles were monodisperse, averaging 105 nm in thickness with a shell approximating 40 nm. The average zeta potential of the nanoparticles was found to be approximately 25 mV.

## II. General model.

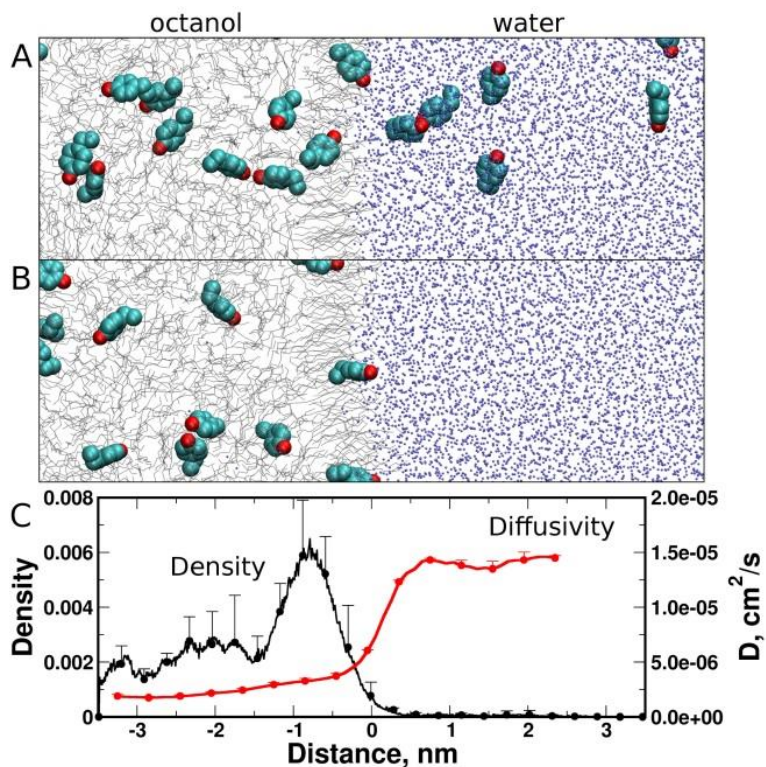

**Figure S1.** Interplay of diffusivity and partitioning in mass distribution. The redistribution of a hydrophobic molecule (*p*-ethylphenol) across octanol/water system; the representative snapshots of the initial (A) and final (B) configurations after 20 ns from MD simulations. The calculated density and diffusivity distributions of *p*-ethylphenol across octanol/water phases (C).

### III. Parameter space

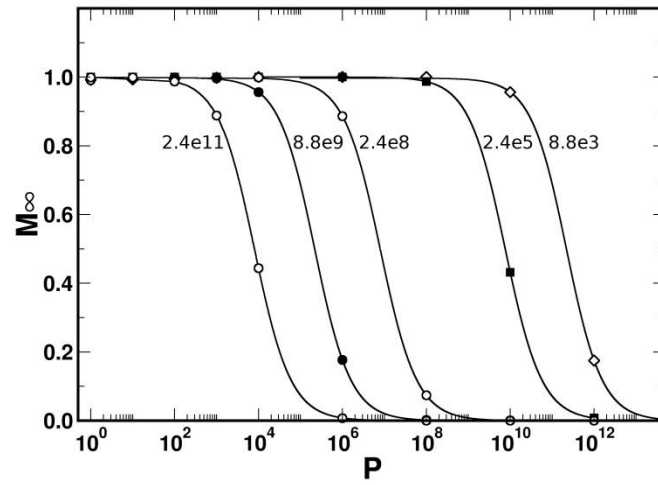

**Figure S2.** Dependence of maximum released mass on partitioning at different concentrations of nanoparticles (*number in in the figure, units  $mL^{-1}$* ) in logarithmic scale.

#### References:

- [1] G. U. Ruiz-Esparza, S. Wu, V. Segura-Ibarra, F. E. Cara, K. W. Evans, M. Milosevic, A. Ziemys, M. Kojic, F. Meric-Bernstam, and M. Ferrari, *Adv. Funct. Mater.* (2014).
